# Supplementary material for: Barriers to Employment for People With Schizophrenia
Source: Atypon-hosted journal article supplement (doi:10.1176/appi.ajp.163.3.411), 2006-03-01
Supplement: ajp_163_3_411_01.pdf [file ajp_163_3_411_01.pdf]

## **Data Supplement 1. Members of the Clinical Antipsychotic Trials of Intervention Effectiveness (CATIE) Study Investigators Group**

The CATIE Study Investigators Group includes Lawrence Adler, M.D., Clinical Insights; Mohammed Bari, M.D., Synergy Clinical Research; Irving Belz, M.D., Tri-County/MHMR; Raymond Bland, M.D., SIU School of Medicine; Thomas Blocher, M.D., MHMRA of Harris County; Brent Bolyard, M.D., Cox North Hospital; Alan Buffenstein, M.D., The Queen's Medical Center; John Burruss, M.D., Baylor College of Medicine; Matthew Byerly, M.D., University of Texas Southwestern Medical Center at Dallas; Jose Canive, M.D., Albuquerque VA Medical Center; Stanley Caroff, M.D., Behavioral Health Service; Charles Casat, M.D., Behavioral Health Center; Eugenio Chavez-Rice, M.D., El Paso Community MHMR Center; John Csernansky, M.D., Washington University School of Medicine; Pedro Delgado, M.D., University Hospitals of Cleveland; Richard Douyon, M.D., VA Medical Center (Miami); Cyril D'Souza, M.D., Connecticut Mental Health Center; Ira Glick, M.D., Stanford University School of Medicine; Donald Goff, M.D., Massachusetts General Hospital; Silvia Gratz, M.D., Eastern Pennsylvania Psychiatric Institute; George T. Grossberg, M.D., St. Louis University School of Medicine-Wohl Institute; Mahlon Hale, M.D., New Britain General Hospital; Mark Hamner, M.D., Medical University of South Carolina and Veterans Affairs Medical Center (Charleston); Richard Jaffe, M.D., Belmont Center for Comprehensive Treatment; Dilip Jeste, M.D., University of California, San Diego and VA Medical Center (San Diego); Anita Kablinger, M.D., Louisiana State University Health Sciences Center; Ahsan Khan, M.D., Psychiatric Research Institute; Steven Lamberti, M.D., University of Rochester Medical Center; Michael T. Levy, M.D., Staten

Island University Hospital; Jeffrey Lieberman, M.D., University of North Carolina at Chapel Hill; Gerald Maguire, M.D., University of California Irvine; Theo Manschreck, M.D., Corrigan Mental Health Center; Joseph McEvoy, M.D., Duke University Medical Center; Mark McGee, M.D., Appalachian Psychiatric Healthcare System; Herbert Meltzer, M.D., Vanderbilt University Medical Center; Alexander Miller, M.D., University of Texas Health Science Center at San Antonio; Del D. Miller, M.D., University of Iowa; Henry Nasrallah, M.D., University of Cincinnati Medical Center; Charles Nemeroff, M.D., Ph.D., Emory University School of Medicine; Stephen Olson, M.D., University of Minnesota Medical School; Gregory F. Oxenkrug, M.D., St. Elizabeth's Medical Center; Jayendra Patel, M.D., University of Mass Health Care; Frederick Reimherr, M.D., University of Utah Medical Center; Silvana Riggio, M.D., Mount Sinai Medical Center–Bronx VA Medical Center; Samuel Risch, M.D., University of California, San Francisco; Bruce Saltz, M.D., Henderson Mental Health Center; Thomas Simpatico, M.D., Northwestern University; George Simpson, M.D., University of Southern California Medical Center; Michael Smith, M.D., Harbor-UCLA Medical Center; Roger Sommi, Pharm.D., University of Missouri; Richard M. Steinbook, M.D., University of Miami School of Medicine; Michael Stevens, M.D., Valley Mental Health; Andre Tapp, M.D., VA Puget Sound Health Care System; Rafael Torres, M.D., University of Mississippi; Peter Weiden, M.D., SUNY Downstate Medical Center; and James Wolberg, M.D., Mount Sinai Medical Center.
