# Supplementary material for: Barriers to Employment for People With Schizophrenia
Source: Atypon-hosted journal article supplement (doi:10.1176/appi.ajp.163.3.411), 2006-03-01
Supplement: ajp_163_3_411_02.pdf [file ajp_163_3_411_02.pdf]

**Data Supplement 2. Sociodemographic and Clinical Characteristics of Patients With Schizophrenia at Entry into the Clinical Antipsychotic Trials of Intervention Effectiveness (CATIE) Study and Characteristics of Patients' Employment Environment, by Patients' Employment Status**

| Characteristic                             | 1. Competitive Paid Employment (N=208 [14.5%]) |      | 2. Other Vocational Activity (N=181 [12.6%]) |      | 3. No Vocational Activity (N=1,049 [72.9%]) |      | Analysis |         |         | Paired Comparisons <sup>a</sup> |
|--------------------------------------------|------------------------------------------------|------|----------------------------------------------|------|---------------------------------------------|------|----------|---------|---------|---------------------------------|
|                                            | Mean                                           | SD   | Mean                                         | SD   | Mean                                        | SD   | F        | df      | p       |                                 |
| Sociodemographic characteristics           |                                                |      |                                              |      |                                             |      |          |         |         |                                 |
| Age (years)                                | 38.05                                          | 10.1 | 39.75                                        | 10.8 | 41.12                                       | 11.3 | 721      | 2,1438  | 0.0008  | 1 < 3                           |
|                                            | N                                              | %    | N                                            | %    | N                                           | %    | $\chi^2$ | df      | p       |                                 |
| Male gender                                | 157                                            | 75.5 | 137                                          | 75.7 | 792                                         | 75.5 | 0.65     | 2       | 0.72    |                                 |
| Race                                       |                                                |      |                                              |      |                                             |      | 15.13    | 5       | 0.004   | 1 not equal to 2, 3             |
| White                                      | 149                                            | 71.6 | 111                                          | 61.3 | 610                                         | 58.2 |          |         |         |                                 |
| Black                                      | 48                                             | 23.1 | 62                                           | 34.3 | 388                                         | 37.0 |          |         |         |                                 |
| Other                                      | 11                                             | 5.3  | 8                                            | 4.4  | 51                                          | 4.9  |          |         |         |                                 |
| Hispanic                                   | 22                                             | 10.6 | 10                                           | 5.5  | 137                                         | 13.1 |          | 2       | 0.27    |                                 |
| Education                                  |                                                |      |                                              |      |                                             |      | 29.82    |         | <0.0001 | 1, 2 not equal to 3             |
| < High school                              | 36                                             | 17.3 | 36                                           | 19.9 | 296                                         | 28.2 |          |         |         |                                 |
| High school or General Equivalency Diploma | 61                                             | 29.3 | 63                                           | 34.8 | 383                                         | 36.5 |          |         |         |                                 |
| >High school                               | 111                                            | 53.3 | 82                                           | 45.3 | 370                                         | 35.3 |          |         |         |                                 |
| Marital status                             |                                                |      |                                              |      |                                             |      | 10.70    | 6       | 0.22    |                                 |
| Married                                    | 33                                             | 15.9 | 14                                           | 7.7  | 119                                         | 11.3 |          |         |         |                                 |
| Divorced/separated                         | 50                                             | 24.0 | 47                                           | 26.0 | 285                                         | 27.2 |          |         |         |                                 |
| Never married                              | 120                                            | 57.7 | 119                                          | 65.8 | 617                                         | 58.8 |          |         |         |                                 |
| Widowed                                    | 5                                              | 2.4  | 1                                            | 0.6  | 28                                          | 2.7  |          |         |         |                                 |
| Public support                             |                                                |      |                                              |      |                                             |      |          |         |         |                                 |
|                                            | Mean                                           | SD   | Mean                                         | SD   | Mean                                        | SD   | F        | df      | p       |                                 |
| Average monthly payments (\$)              | 262                                            | 391  | 531                                          | 584  | 546                                         | 586  | 22.3     | 2, 1438 | <0.0001 | 1 < 2, 3                        |
|                                            | N                                              | %    | N                                            | %    | N                                           | %    | $\chi^2$ | df      | p       |                                 |

|                                                                      | Mean  | SD    | Mean  | SD    | Mean  | SD    | F     | df      | p       |                     |
|----------------------------------------------------------------------|-------|-------|-------|-------|-------|-------|-------|---------|---------|---------------------|
| Payment level                                                        |       |       |       |       |       |       | 68.8  | 5       | <0.0001 | 1 not equal to 2, 3 |
| None                                                                 | 126   | 60.6  | 60    | 33.2  | 325   | 31.0  |       |         |         |                     |
| \$1–650                                                              | 50    | 24.0  | 60    | 33.2  | 381   | 36.3  |       |         |         |                     |
| >\$650                                                               | 32    | 15.4  | 61    | 33.7  | 343   | 32.7  |       |         |         |                     |
| Social Security Disability Insurance or Supplemental Security Income | 75    | 36.1  | 101   | 55.8  | 638   | 60.8  | 42.7  | 2       | <0.0001 | 1 < 2, 3            |
| Department of Veterans Affairs compensation or pension               | 8     | 3.9   | 12    | 6.6   | 83    | 7.9   | 4.4   | 2       | 0.11    |                     |
| Participation in rehabilitation                                      | 13    | 6.3   | 130   | 71.8  | 43    | 4.1   | 130.9 | 2       | <0.0001 | 2 > 1, 3            |
|                                                                      | Mean  | SD    | Mean  | SD    | Mean  | SD    | F     | df      | p       |                     |
| Clinical status                                                      |       |       |       |       |       |       |       |         |         |                     |
| Schizophrenia symptoms (Positive and Negative Syndrome Scale score)  |       |       |       |       |       |       |       |         |         |                     |
| Total                                                                | 71.1  | 17.6  | 72.8  | 17.3  | 77.1  | 17.4  | 12.90 | 2, 1435 | <0.0001 | 1, 2 < 3            |
| Positive                                                             | 17.7  | 5.8   | 17.7  | 5.3   | 18.8  | 5.6   | 5.11  | 2, 1435 | 0.006   |                     |
| Negative                                                             | 18.5  | 6.0   | 18.3  | 5.8   | 20.8  | 6.5   | 20.56 | 2, 1435 | <0.0001 | 1, 2 < 3            |
| General                                                              | 34.8  | 9.1   | 36.9  | 9.4   | 37.5  | 9.3   | 7.13  | 2, 1435 | 0.0008  | 1 < 3               |
| Depression (Calgary Depression Rating Scale score)                   |       |       |       |       |       |       |       |         |         |                     |
| Depression Rating Scale score)                                       | 1.52  | 0.52  | 1.56  | 0.53  | 1.579 | 0.56  | 0.77  | 2, 1438 | 0.46    |                     |
| Alcohol Use Scale score                                              | 1.54  | 0.75  | 1.44  | 0.73  | 1.43  | 0.69  | 2.27  | 2, 1438 | 0.10    |                     |
| Drug Use Scalse score                                                | 1.36  | 0.67  | 1.34  | 0.69  | 1.36  | 0.74  | 0.07  | 2, 1438 | 0.93    |                     |
| Side effects                                                         |       |       |       |       |       |       |       |         |         |                     |
| Tardive dyskinesia (Abnormal Involuntary Movement Scale score)       |       |       |       |       |       |       |       |         |         |                     |
| Akathisia (Barnes Rating Scale for Drug-Induced Akathisia score)     | 0.18  | 0.40  | 0.28  | 0.42  | 0.27  | 0.47  | 3.42  | 2, 1437 | 0.03    |                     |
| Extrapyramidal symptoms (Simpson-Angus Rating Scale score)           | 0.29  | 0.50  | 0.36  | 0.45  | 0.36  | 0.57  | 1.43  | 2, 1437 | 0.24    |                     |
| Heinrichs-Carpenter Quality                                          | 0.227 | 0.340 | 0.224 | 0.346 | 0.215 | 0.317 | 0.06  | 2, 1436 | 0.94    |                     |

|                                                                                       |      |      |      |      |       |        |         |         |           |           |
|---------------------------------------------------------------------------------------|------|------|------|------|-------|--------|---------|---------|-----------|-----------|
| of Life Scale score                                                                   |      |      |      |      |       |        |         |         |           |           |
| Total                                                                                 | 3.40 | 1.02 | 3.11 | 0.95 | 2.43  | 1.00   | 101.67  | 2, 1434 | <0.0001   | 1, 2 > 3  |
| Social relationships                                                                  | 2.84 | 1.27 | 2.82 | 1.27 | 2.41  | 1.29   | 15.52   | 2, 1434 | <0.0001   | 1, 2 > 3  |
| Instrumental activity<br>Objects/activity                                             | 3.82 | 1.41 | 2.80 | 1.42 | 1.49  | 1.40   | 274.39  | 2, 1433 | <0.0001   | 1 > 2 > 3 |
| 4.18                                                                                  | 1.29 | 3.74 | 1.15 | 2.94 | 1.28  | 100.58 | 2, 1434 | <0.0001 | 1 > 2 > 3 |           |
| Intrapsychic functioning<br>(six items)                                               |      |      |      |      |       |        |         |         |           |           |
|                                                                                       | 3.62 | 1.15 | 3.41 | 1.02 | 2.69  | 1.10   | 82.90   | 2, 1434 | <0.0001   | 1, 2 > 3  |
| Hip-to-waist ratio                                                                    | 0.91 | 0.09 | 0.92 | 0.08 | 0.93  | 0.08   | 4.27    | 2, 1413 | 0.02      |           |
| Neurocognitive functioning <sup>b</sup>                                               |      |      |      |      |       |        |         |         |           |           |
| Total                                                                                 | 0.20 | 0.67 | 0.11 | 0.61 | -0.09 | 0.64   | 10.06   | 2, 1321 | <0.0001   | 1, 2 > 3  |
| Processing speed                                                                      | 0.23 | 0.75 | 0.15 | 0.73 | -0.07 | 0.73   | 17.30   | 2, 1321 | <0.0001   | 1, 2 > 3  |
| Verbal memory                                                                         | 0.18 | 0.89 | 0.15 | 0.83 | -0.07 | 0.90   | 9.67    | 2, 1321 | <0.0001   | 1, 2 > 3  |
| Vigilance                                                                             | 0.19 | 0.98 | 0.03 | 0.85 | -0.13 | 0.87   | 10.96   | 2, 1203 | <0.0001   | 1 > 3     |
| Reasoning                                                                             | 0.20 | 0.74 | 0.11 | 0.76 | -0.06 | 0.79   | 10.80   | 2, 1320 | <0.0001   | 1 > 3     |
| Working memory                                                                        | 0.17 | 0.84 | 0.14 | 0.79 | -0.08 | 0.88   | 10.40   | 2, 1320 | <0.0001   | 1, 2 > 3  |
| Employment environment (site-<br>level measures)                                      |      |      |      |      |       |        |         |         |           |           |
| County unemployment rate<br>(%)                                                       | 6.0  | 1.6  | 5.9  | 14.8 | 5.9   | 1.4    | 0.45    | 2, 1434 | 0.42      |           |
| Rate of CATIE subjects'<br>participation in vocational<br>rehabilitation services (%) | 7.9  | 7.0  | 11.9 | 9.7  | 6.6   | 7.2    | 38.38   | 2, 1438 | <0.0001   | 2 > 1, 3  |

<sup>a</sup>p<0.01 (Tukey).

<sup>b</sup>Scores from several tests were converted to z scores and combined to derive scores for five categories of neurocognitive functioning. The five scores were averaged to derive the total score. See description of the tests in the Measures subsection of the Method section.
