# Supplementary material for: Barriers to Employment for People With Schizophrenia
Source: Atypon-hosted journal article supplement (doi:10.1176/appi.ajp.163.3.411), 2006-03-01
Supplement: ajp_163_3_411_03.pdf [file ajp_163_3_411_03.pdf]

**Data Supplement 3. Hierarchical Multinomial Regression Analysis of Variables Associated With Competitive Paid Employment and Other Vocational Activity, Compared to No Vocational Activity, in Patients With Schizophrenia (N=1,411)**

| Variable                                              | Model 1 <sup>a</sup>        |                           | Model 2 <sup>a</sup>        |                           | Model 3 <sup>a</sup>        |                           |
|-------------------------------------------------------|-----------------------------|---------------------------|-----------------------------|---------------------------|-----------------------------|---------------------------|
|                                                       | Competitive Paid Employment | Other Vocational Activity | Competitive Paid Employment | Other Vocational Activity | Competitive Paid Employment | Other Vocational Activity |
| Age (10-year increments)                              | 0.91                        | 0.92                      | 0.90                        | 0.88                      | 0.90                        | 0.89                      |
| Black                                                 | 0.51**                      | 0.99                      | 0.50***                     | 0.95                      | 0.48***                     | 0.94                      |
| Education                                             |                             |                           |                             |                           |                             |                           |
| <High school                                          | 1.00                        | 1.00                      | 1.00                        | 1.00                      | 1.00                        | 1.00                      |
| High school                                           | 1.35                        | 1.35                      | 1.34                        | 1.32                      | 1.43                        | 1.35                      |
| >High school                                          | 2.16**                      | 1.70*                     | 2.10**                      | 1.63*                     | 1.87**                      | 1.48                      |
| Neurocognitive functioning score                      | 1.27                        | 1.32                      | 1.09                        | 1.11                      | 0.89                        | 0.95                      |
| Waist-to-hip ratio (10% change)                       | 0.85                        | 0.87                      | 1.17                        | 1.13                      | 0.84                        | 0.24                      |
| Public support                                        |                             |                           |                             |                           |                             |                           |
| None                                                  | 1.00                        | 1.00                      | 1.00                        | 1.00                      | 1.00                        | 1.00                      |
| \$1–650                                               | 0.41†                       | 0.94                      | 0.39†                       | 0.87                      | 0.39†                       | 0.87                      |
| >\$650                                                | 0.27†                       | 1.13                      | 0.26†                       | 1.08                      | 0.27†                       | 1.07                      |
| Symptoms (Positive and Negative Syndrome Scale score) |                             |                           |                             |                           |                             |                           |
| Positive                                              | 0.50**                      | 0.51*                     | 0.66                        | 0.68                      | 0.95                        | 0.91                      |
| Negative                                              |                             |                           | 0.35***                     | 0.29†                     | 0.78                        | 0.50*                     |
| Intrapsychic functioning                              |                             |                           |                             |                           | 6.69†                       | 4.01†                     |

<sup>a</sup>Adjusted odds ratios.

\*p<0.05.

\*\*p<0.01.

\*\*\*p<0.001.

†p<0.0001.
